# Supplementary material
Source: PubMed Central journal article supplement (PMC524279)

Figure 7. The figures give "rank plots" for datasets A-G produced by GenePix®. Each figure is similar to Figures 2-5 in the paper, which give "rank plots" for Datasets C and D.

Figure 7A (GenePix).

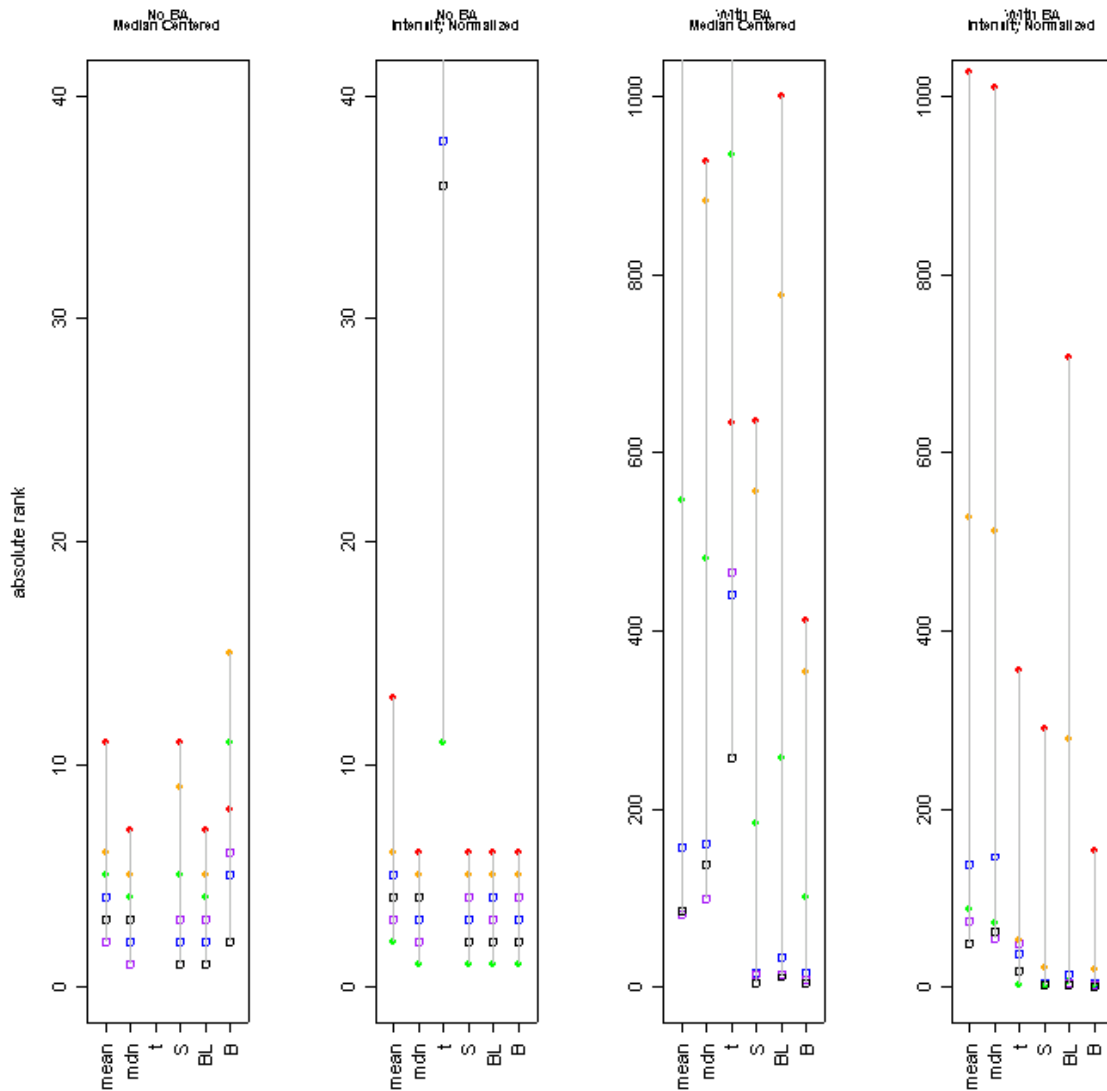

Figure 7B (GenePix)

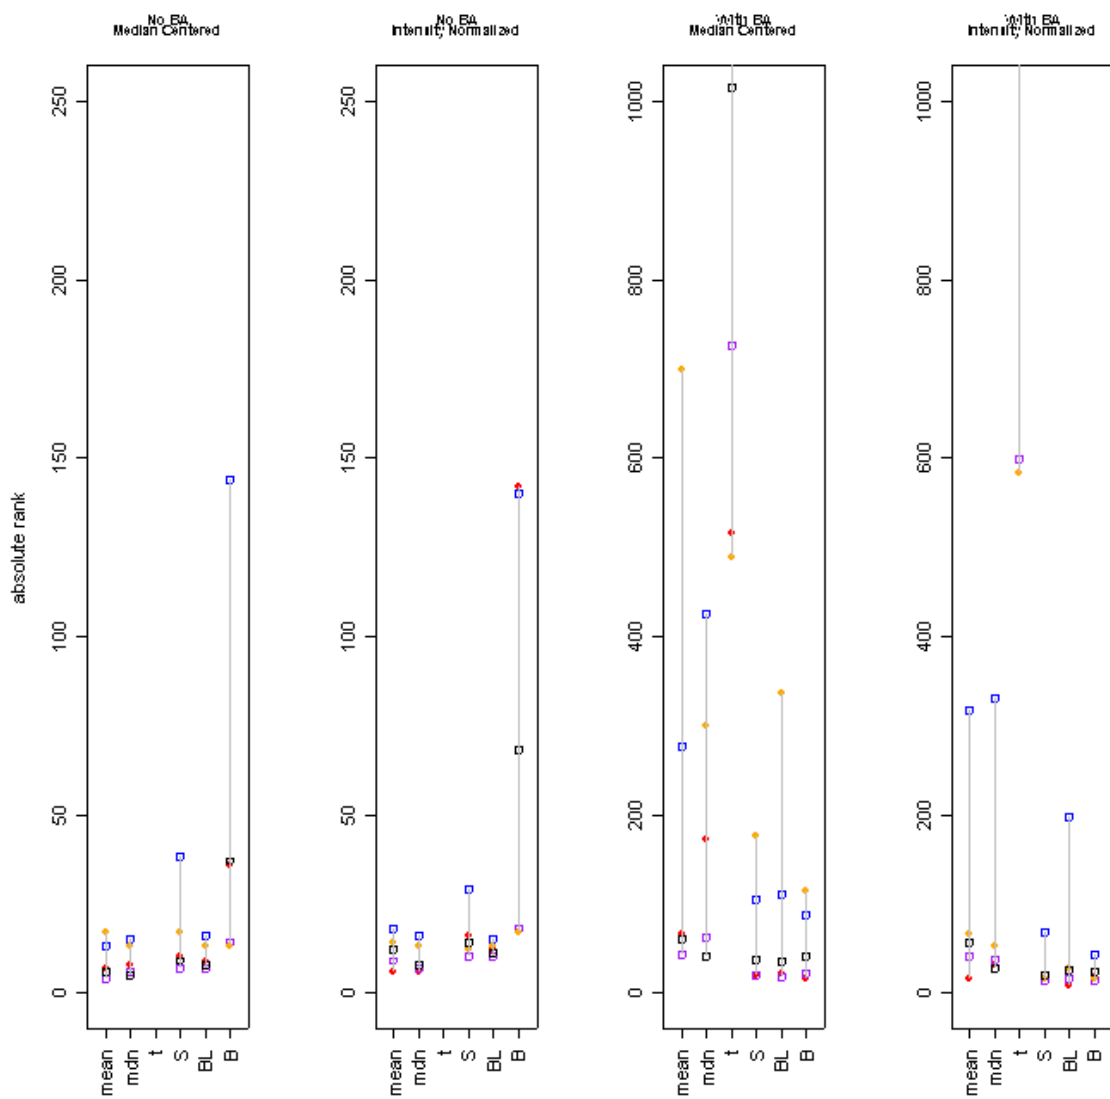

Figure 7C (GenePix)

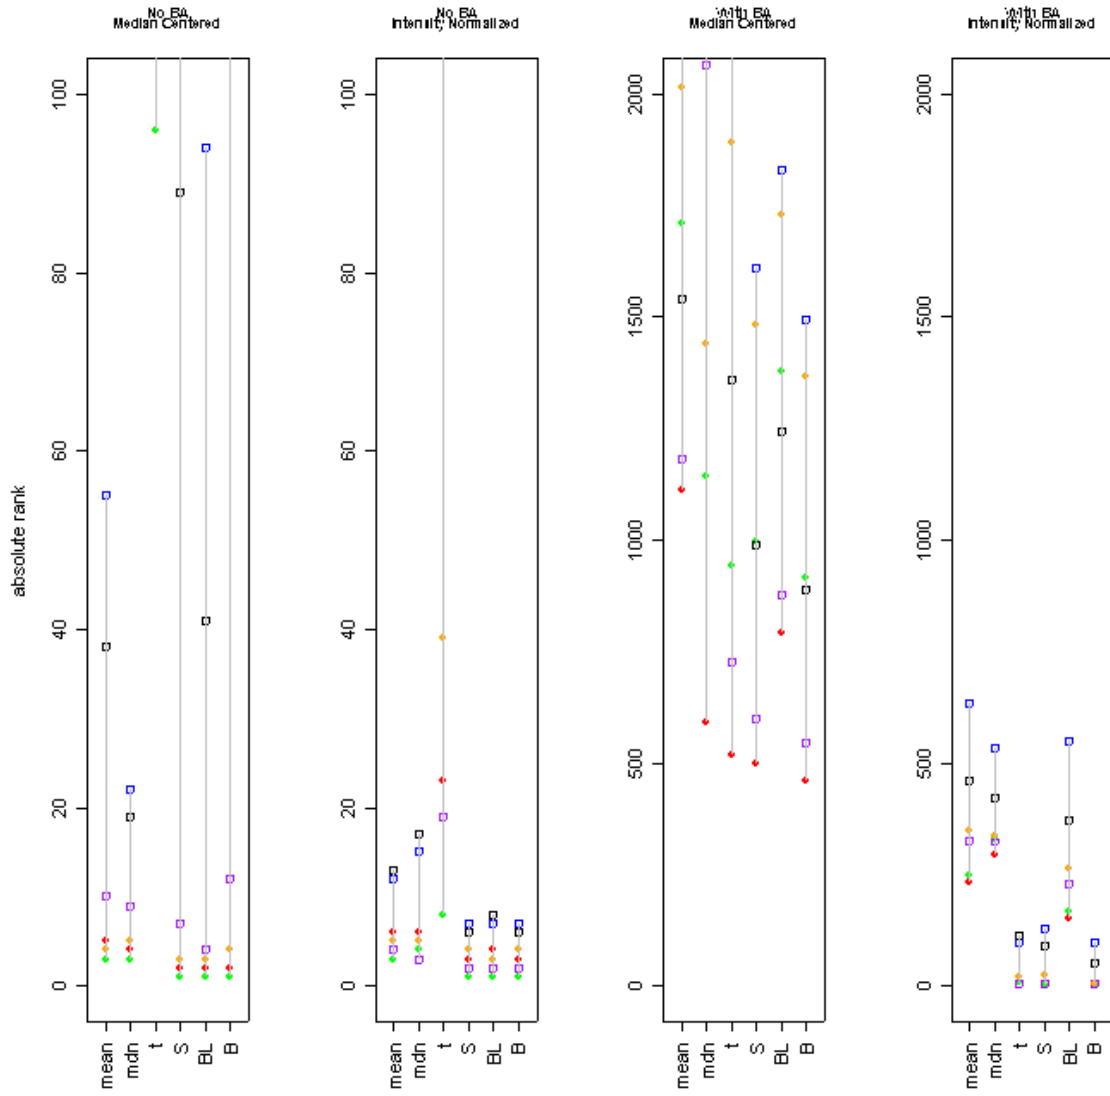

Figure 7D (GenePix)

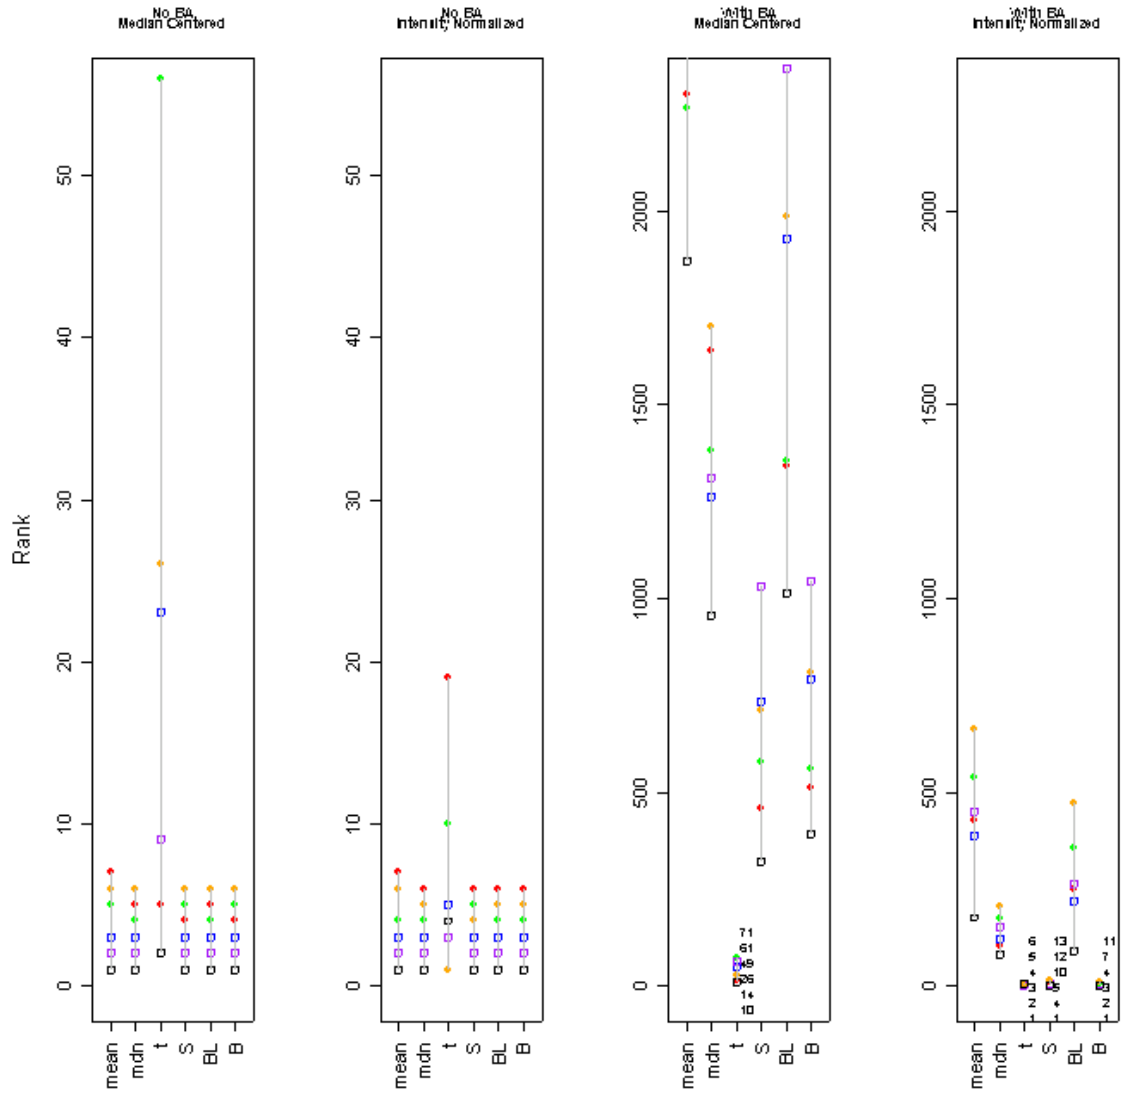

Figure 7E (GenePix)

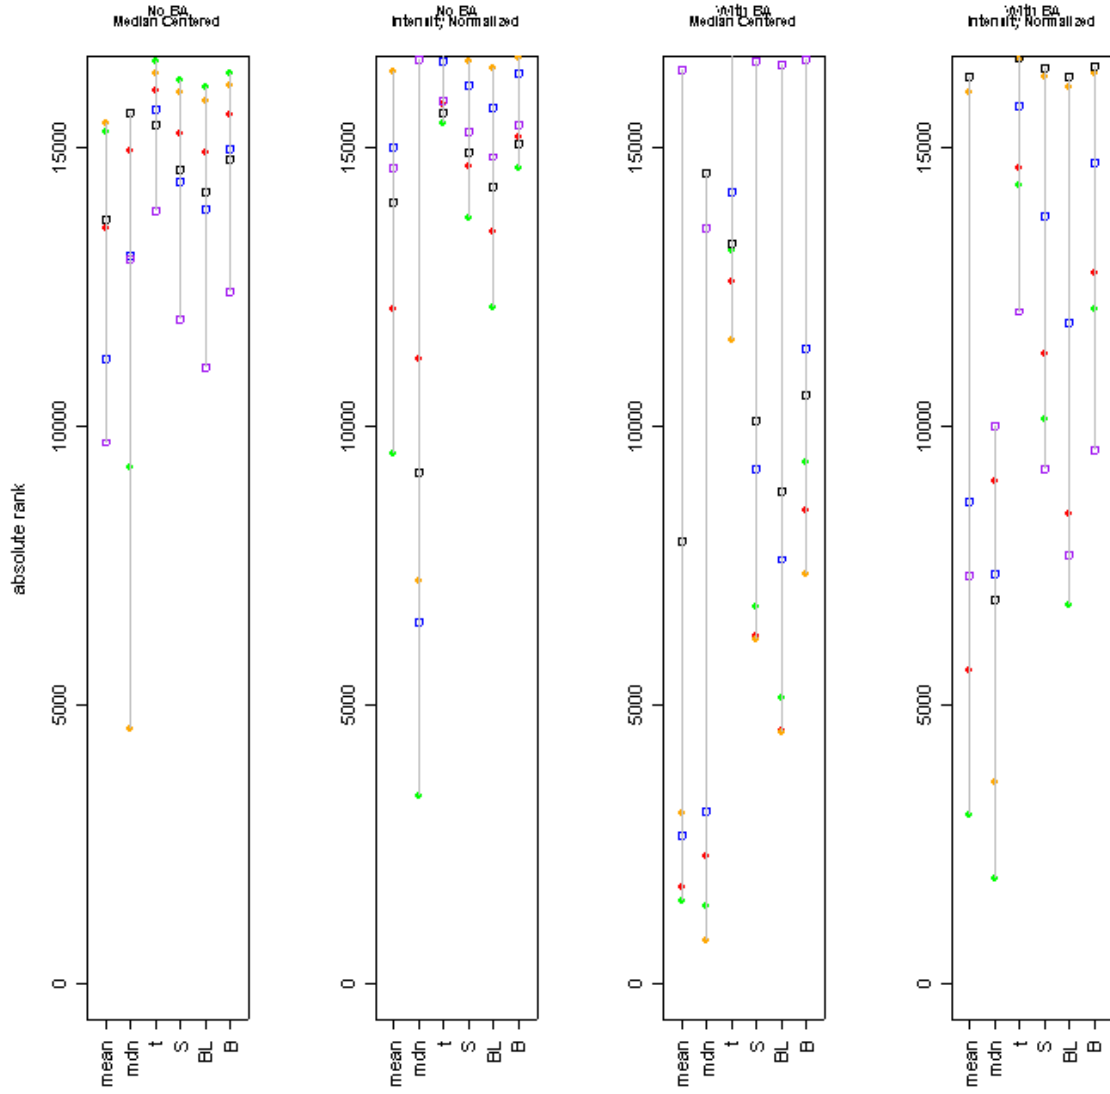

Figure 7F (GenePix)

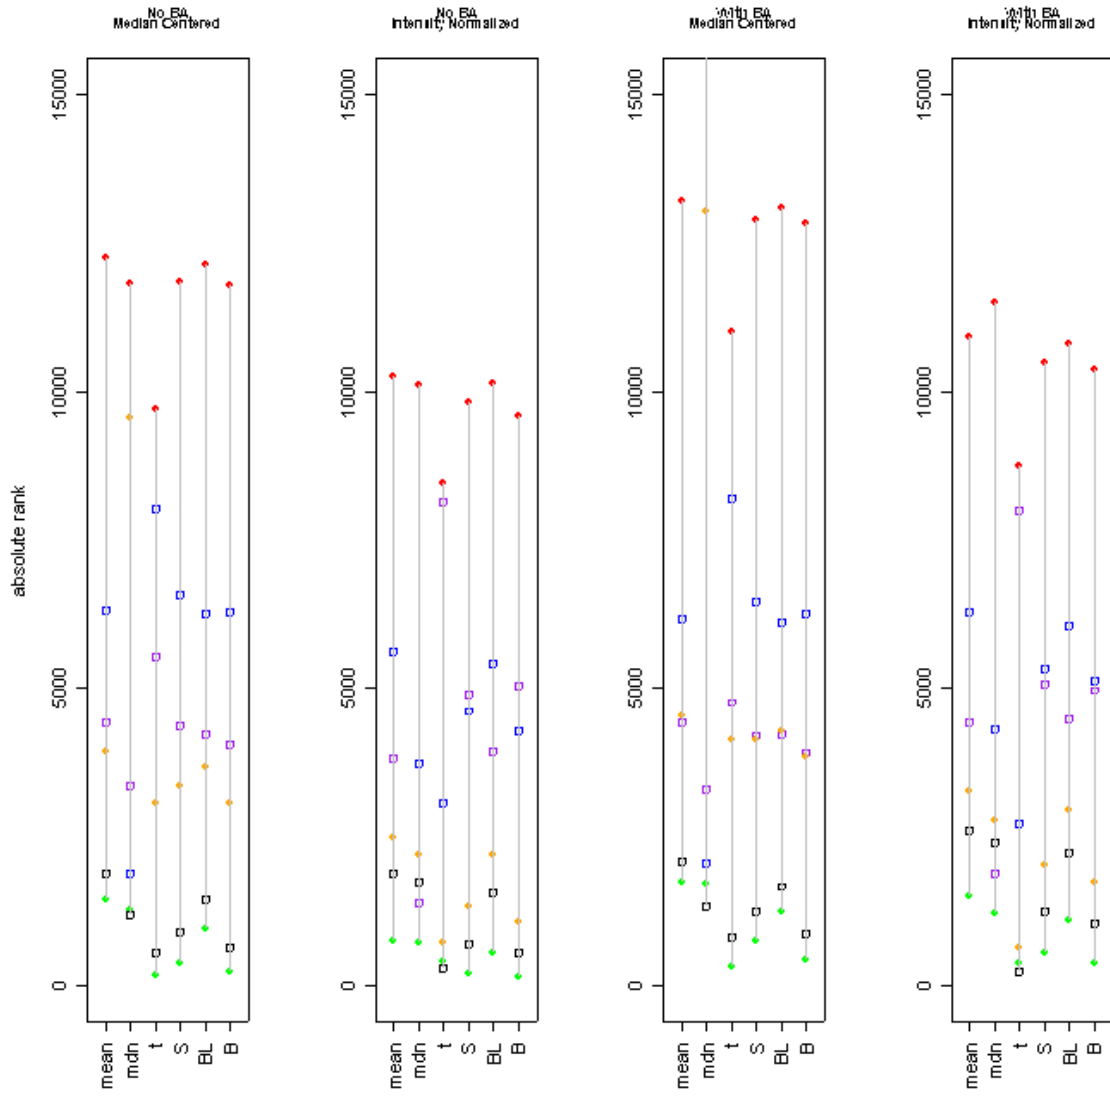

Figure 7G (GenePix)

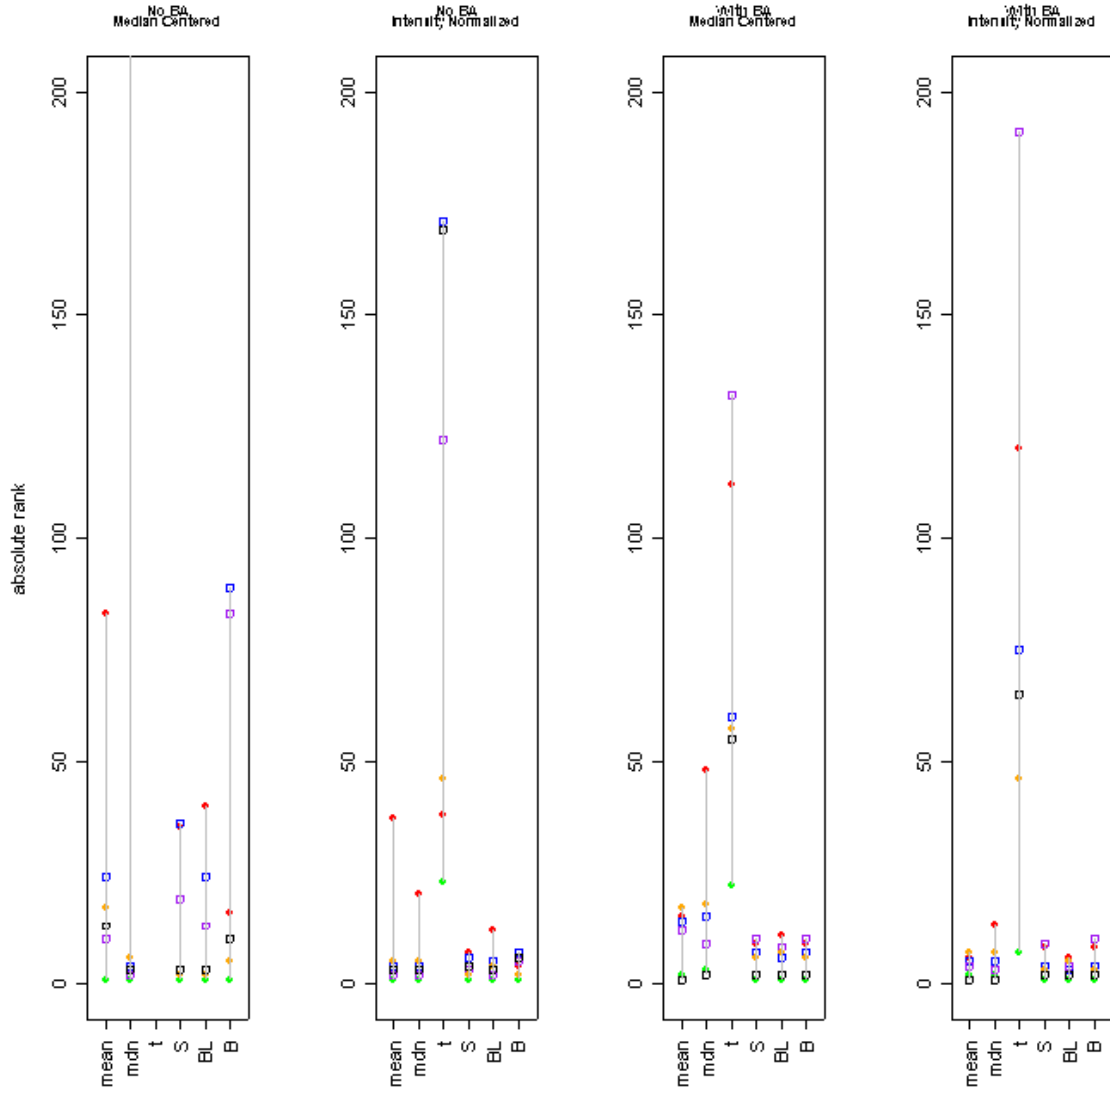

Figure 8. The figures give "rank plots" for datasets B-G produced by SPOT. Each figure is similar to Figures 2-5 in the paper, which give "rank plots" for Datasets C and D.

Figure 8B (SPOT).

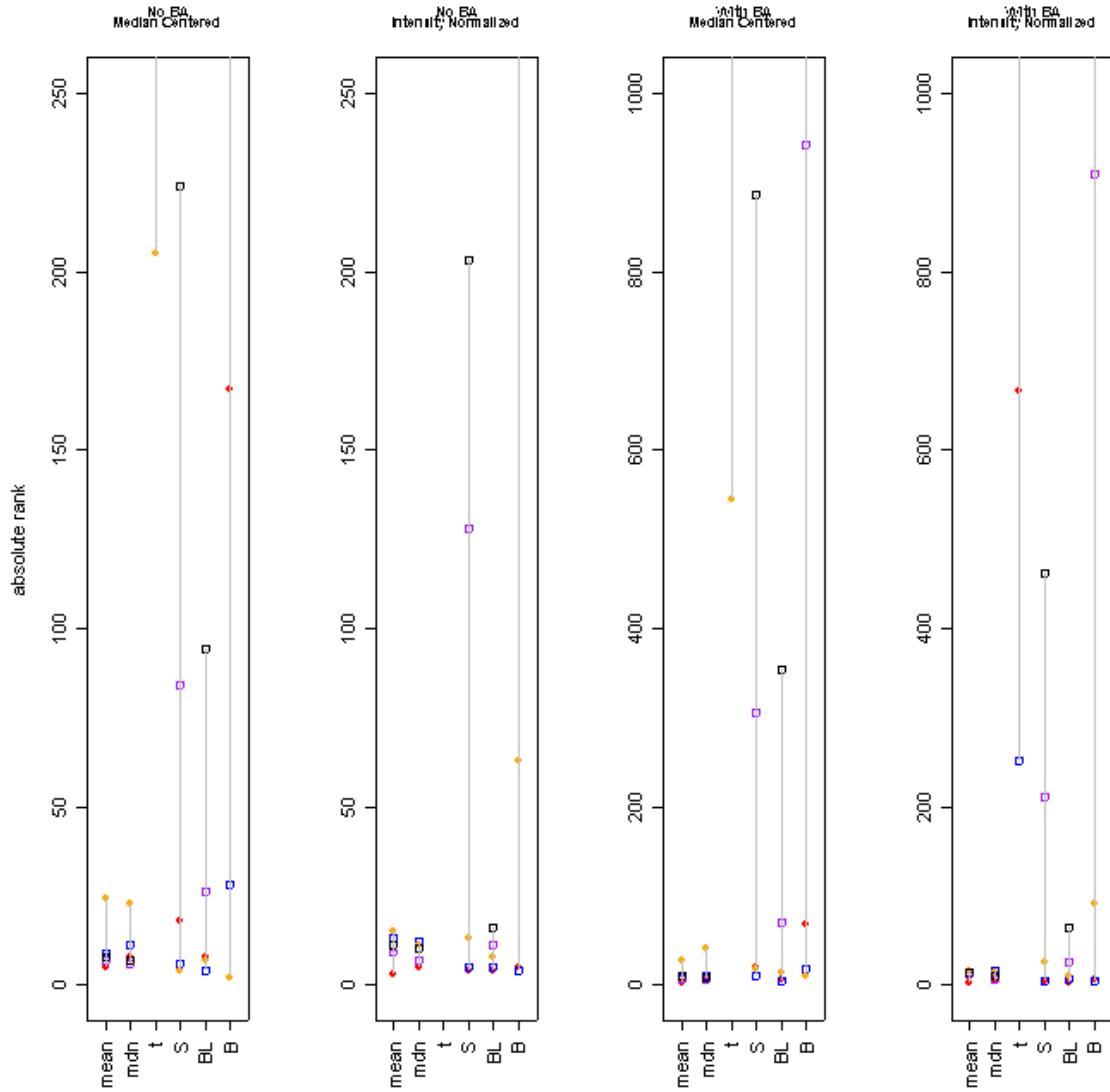



Figure 8C (SPOT)

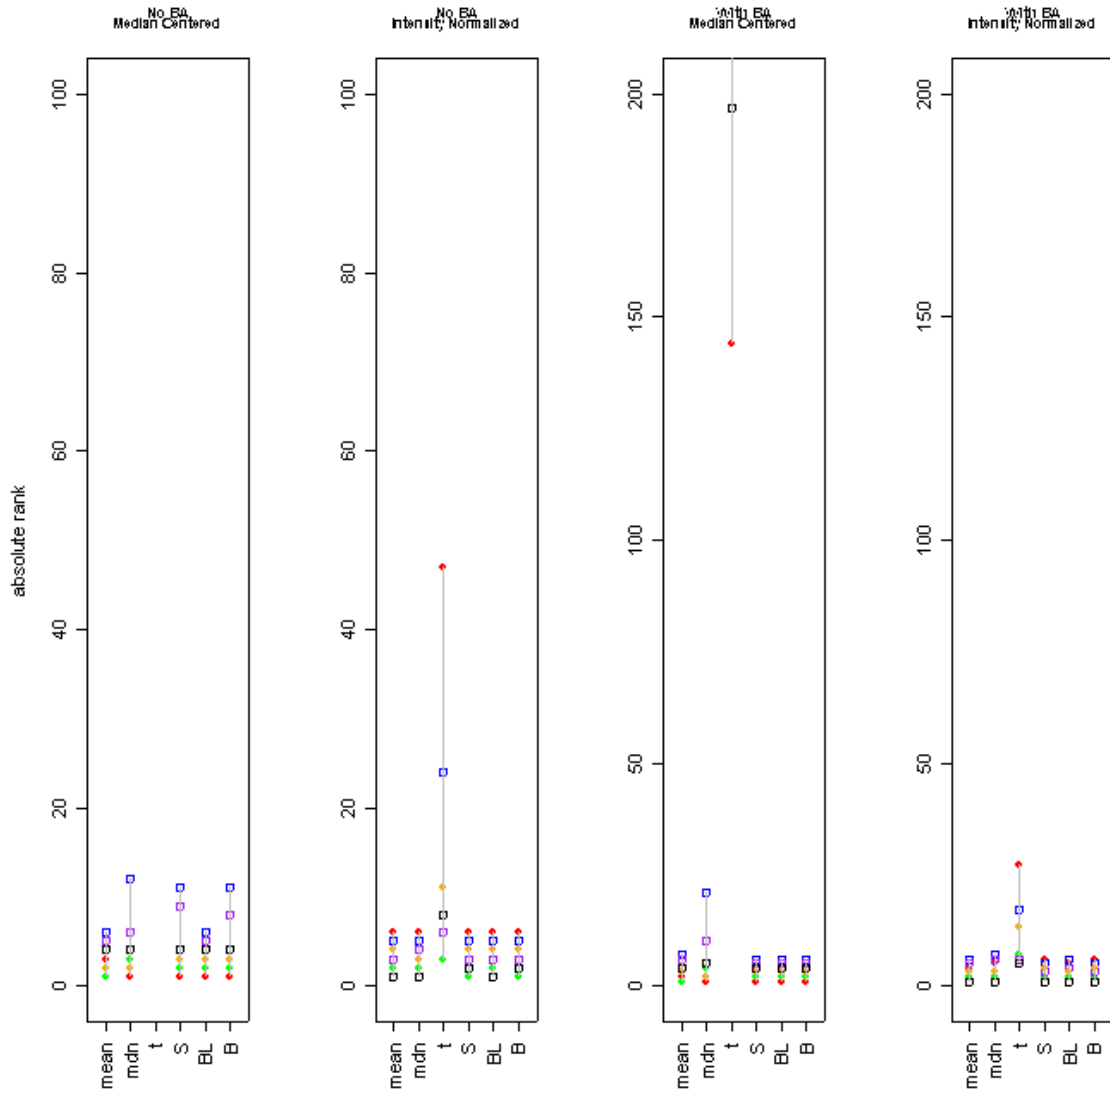

Figure 8D (SPOT)

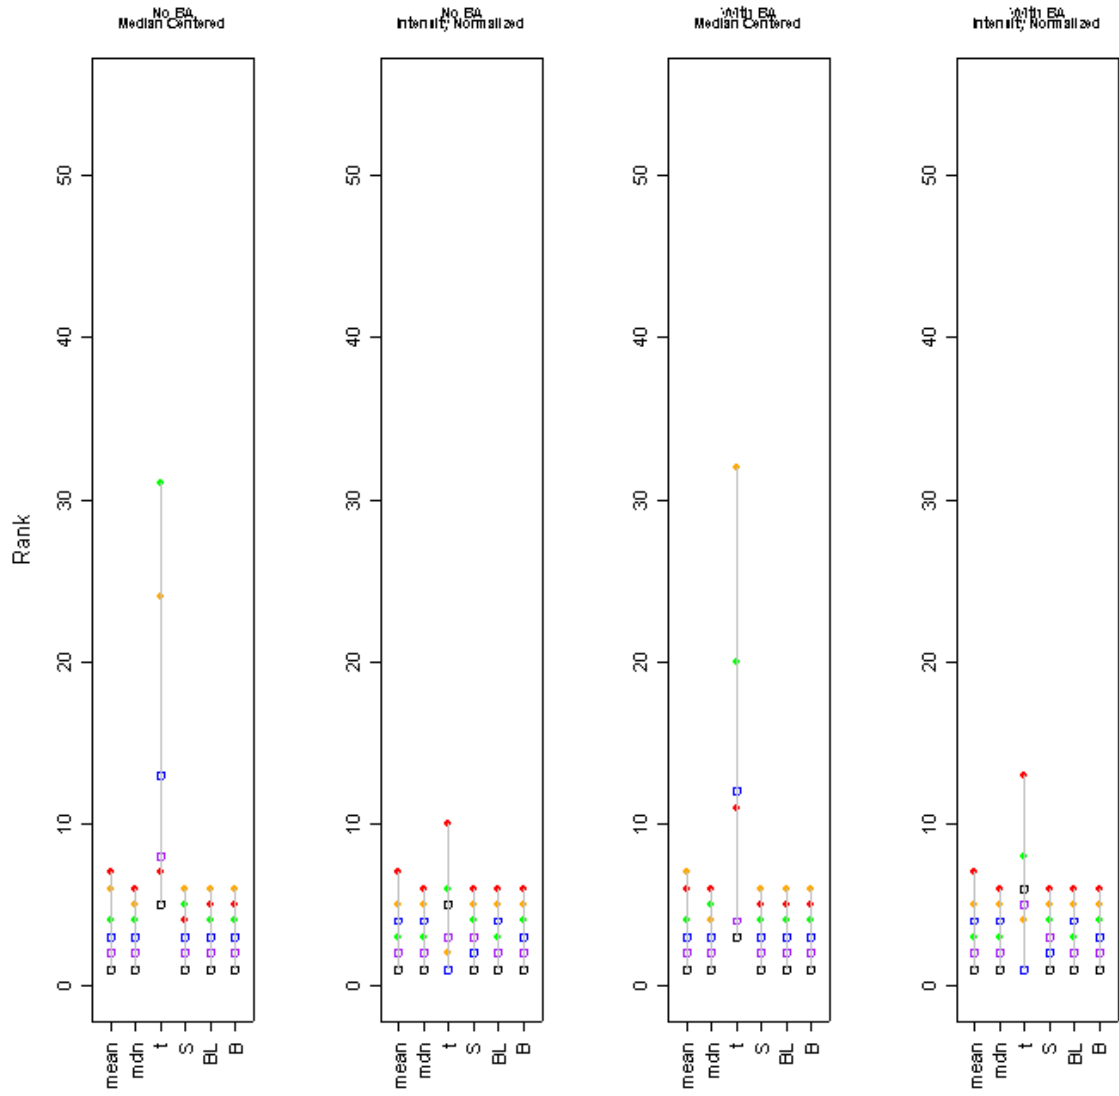

Figure 8E (SPOT)

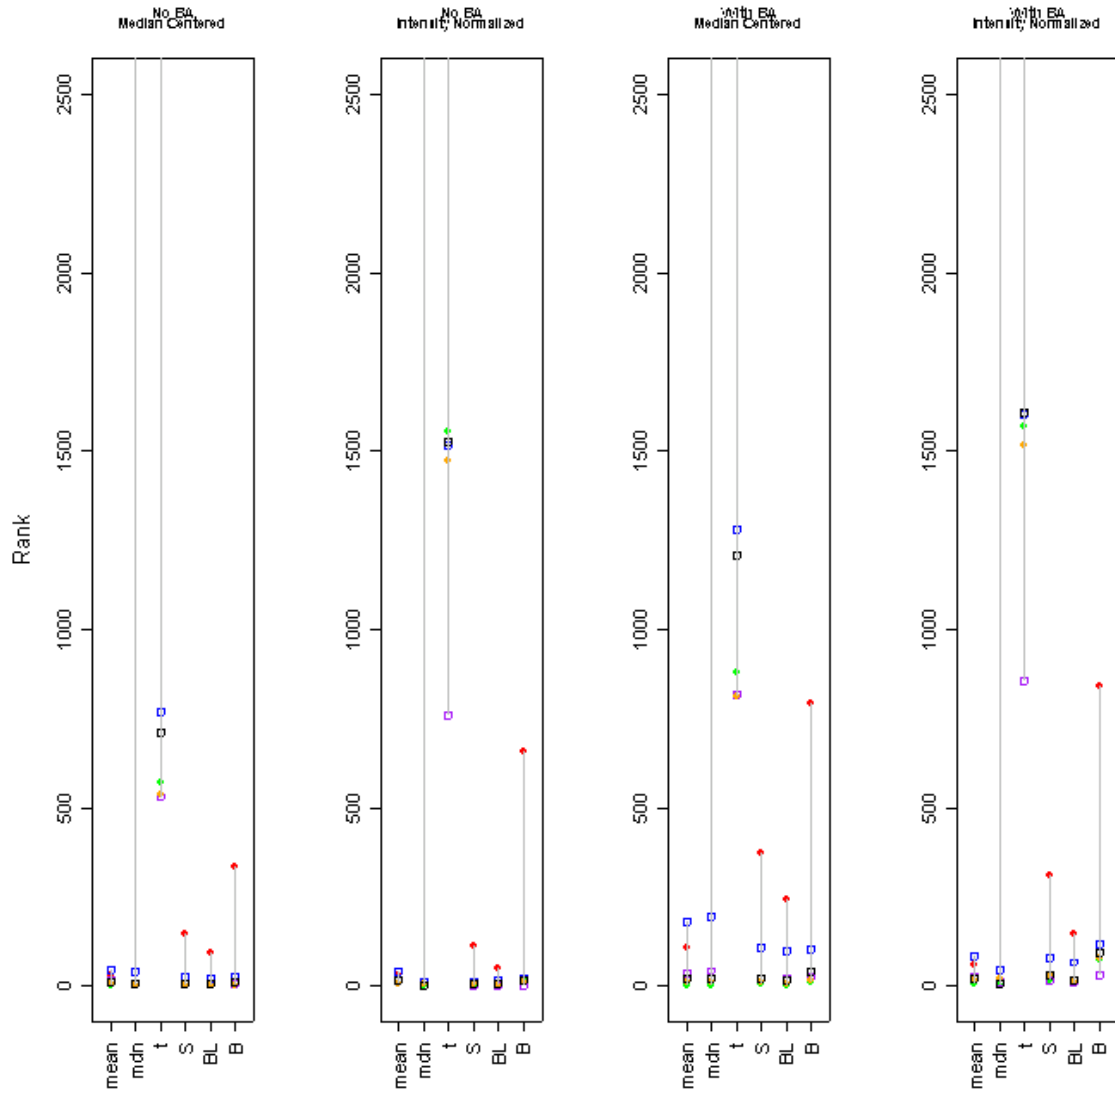

Figure 8F (SPOT)

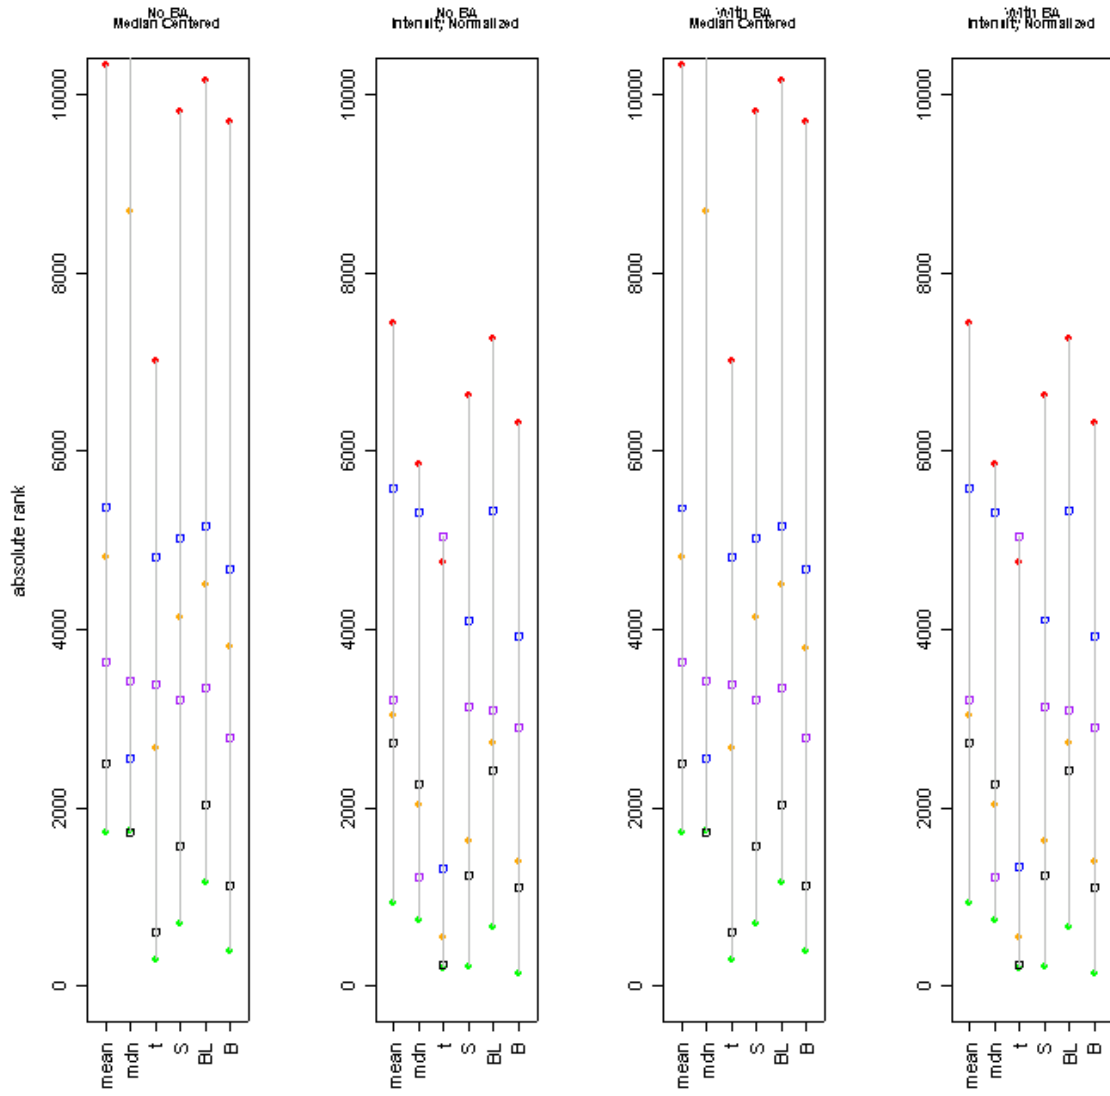

Figure 8G (SPOT)

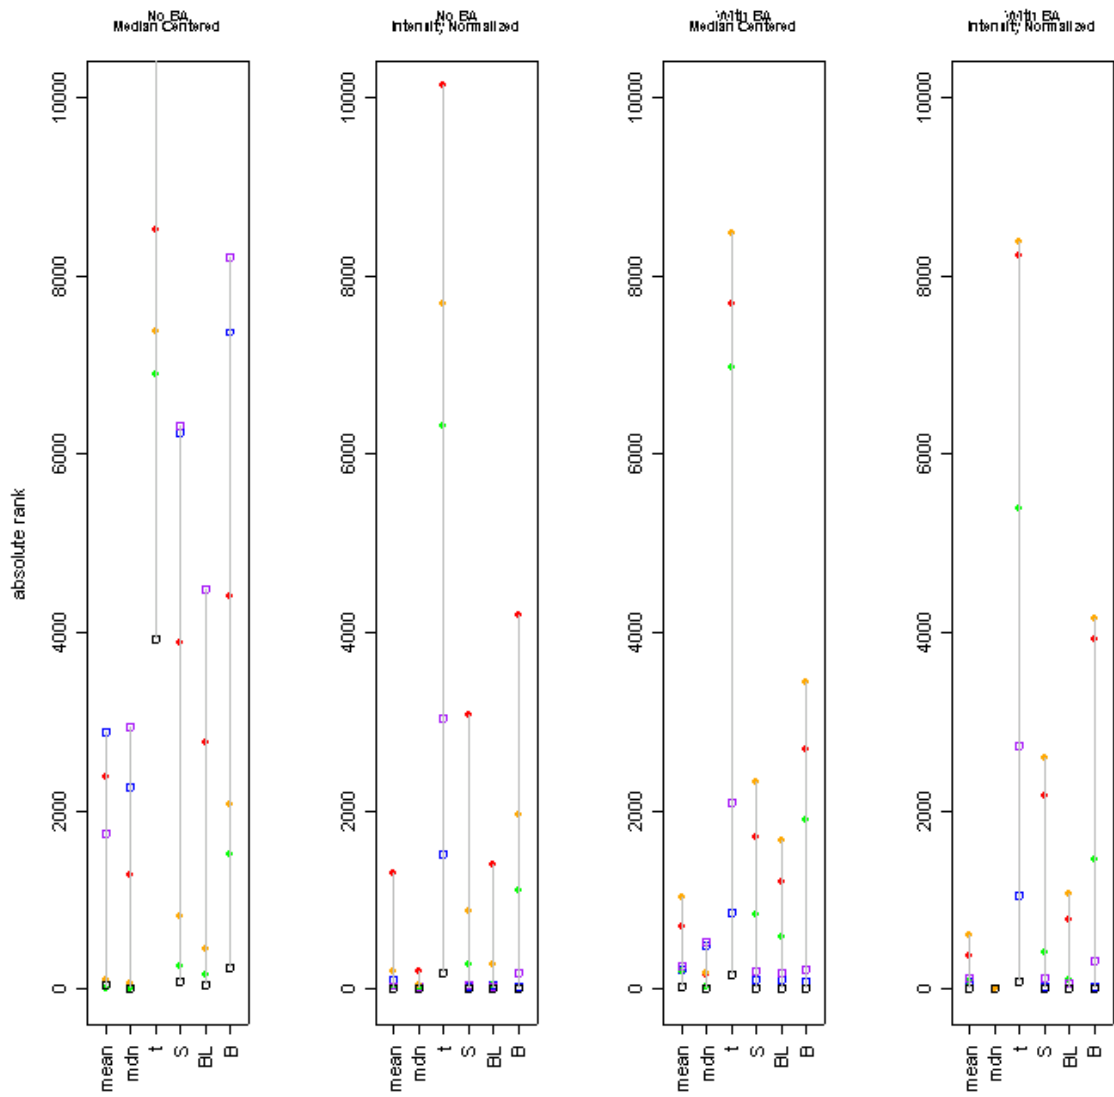

Figure 9. The figures give "rank plots" for datasets E and F produced by ArraySuite or QuantArray. Each figure is similar to Figures 2-5 in the paper, which give "rank plots" for Datasets C and D.

Figure 9E (ArraySuite)

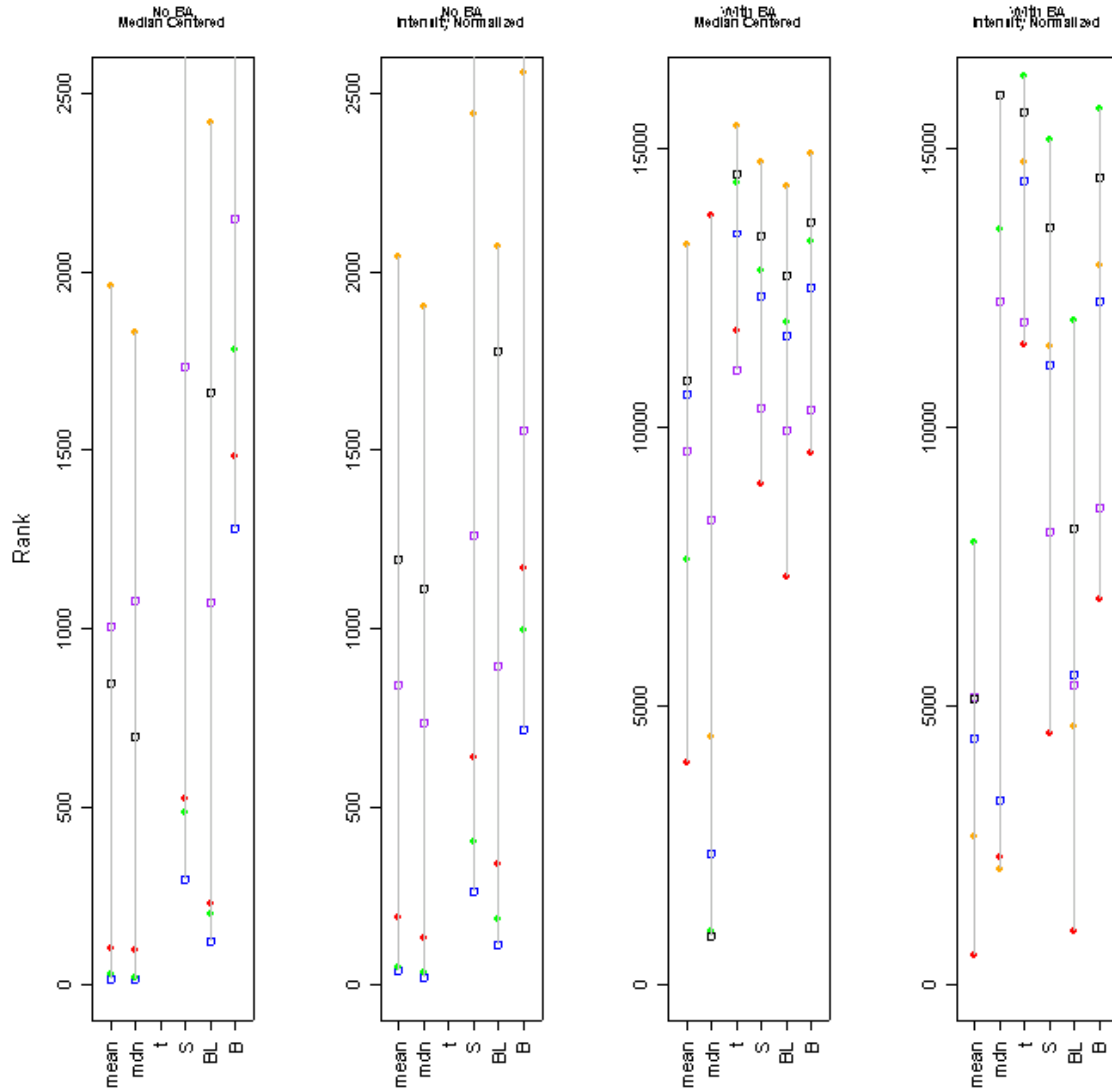

Figure 9F (QuantArray)

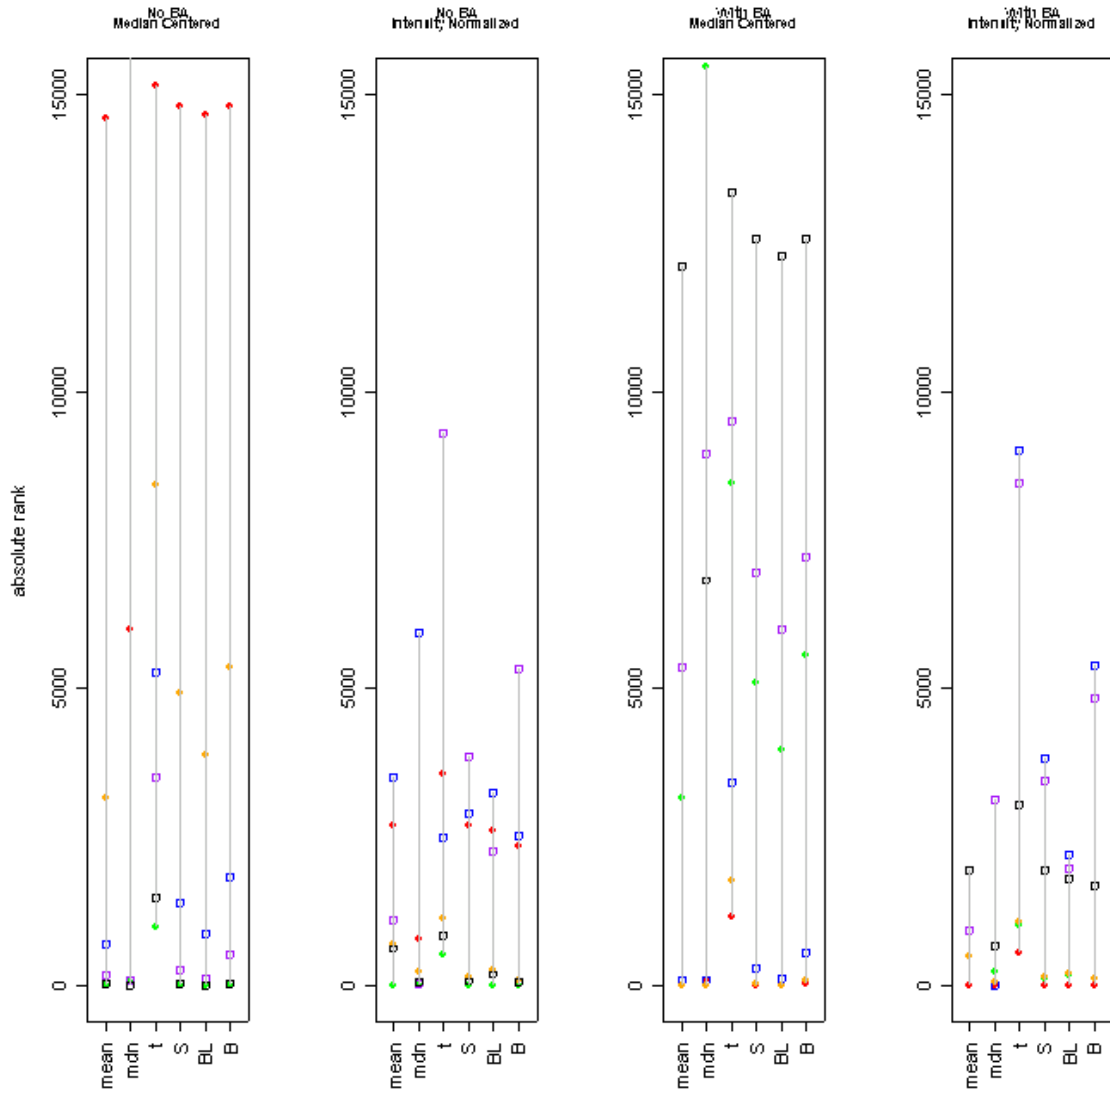

Figure 10. The figures give "rank plots" for datasets H, I, and J produced by GenePix® or ArraySuite. Each figure is similar to Figures 2-5 in the paper, which give "rank plots" for Datasets C and D.

Figure 10H (GenePix)

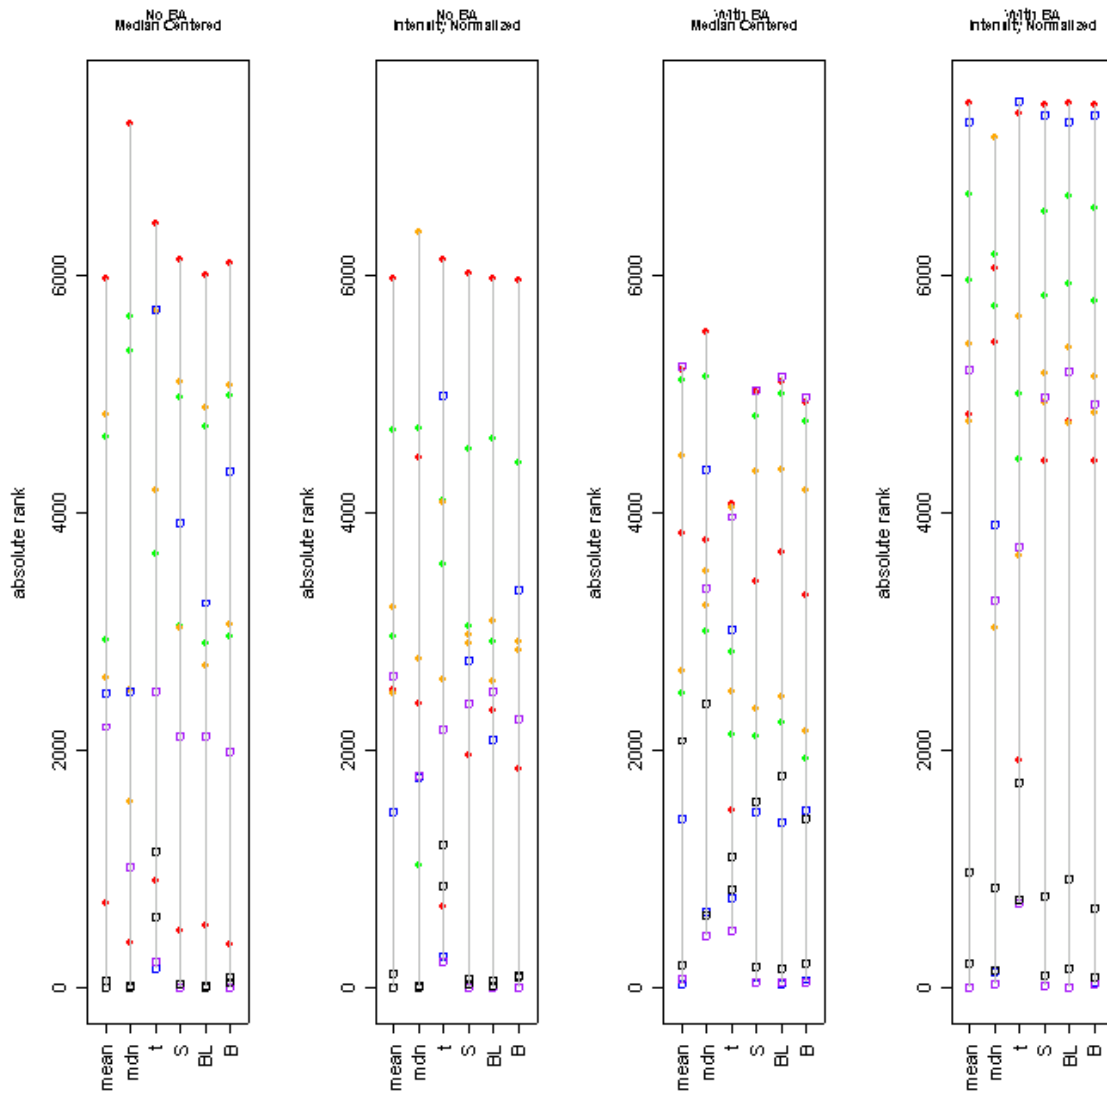



Figure 10I (GenePix)

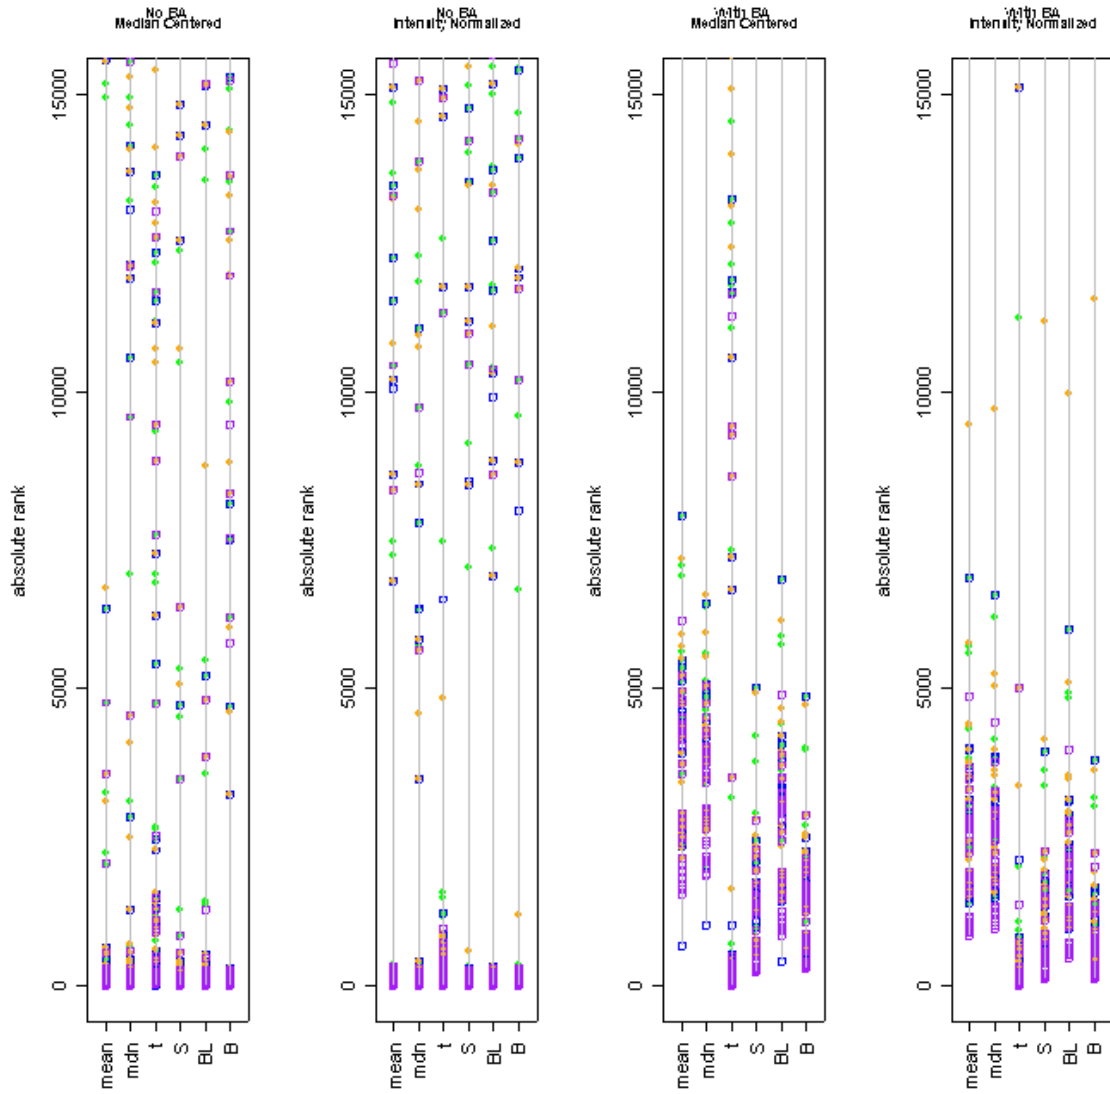

Figure 10J (ArraySuite)

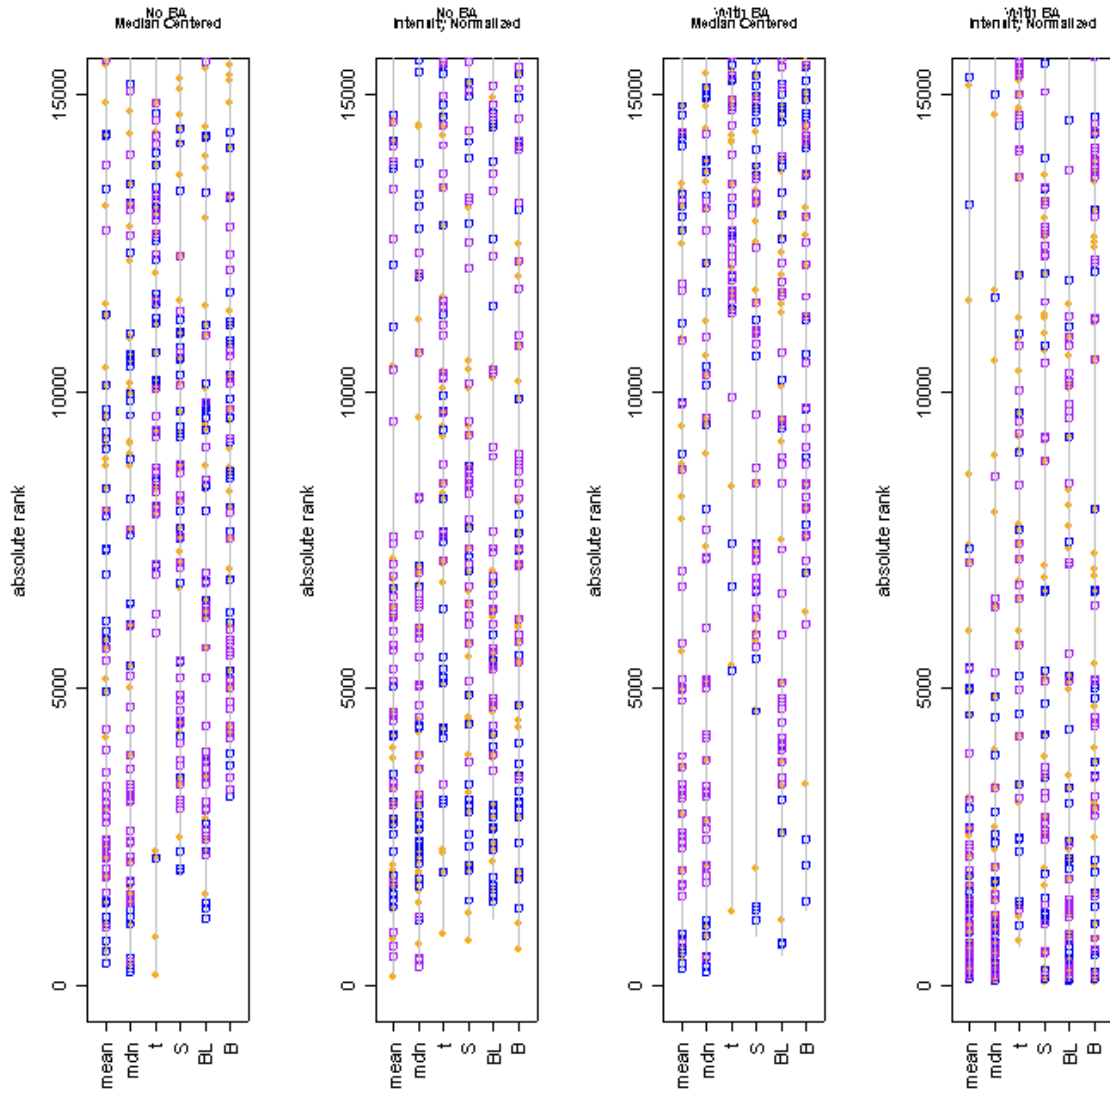

Figure 11. The figures show the t-statistic plotted against the average signal intensity across the four arrays in an experiment. Each plot has four panels for the four different versions of each dataset.

Figure 11A. Dataset A.

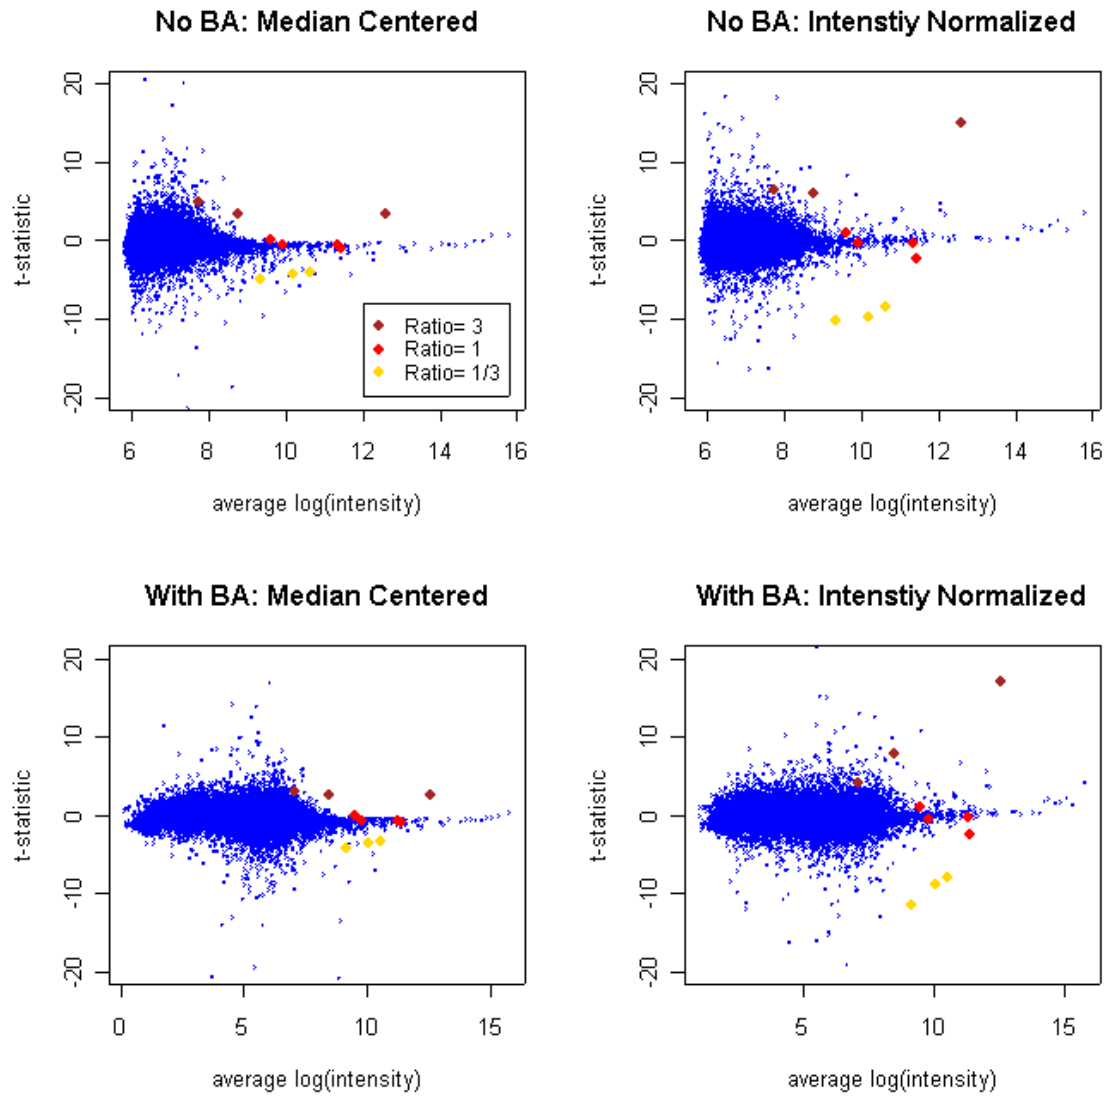

Figure 11B. Dataset B (GenePix).

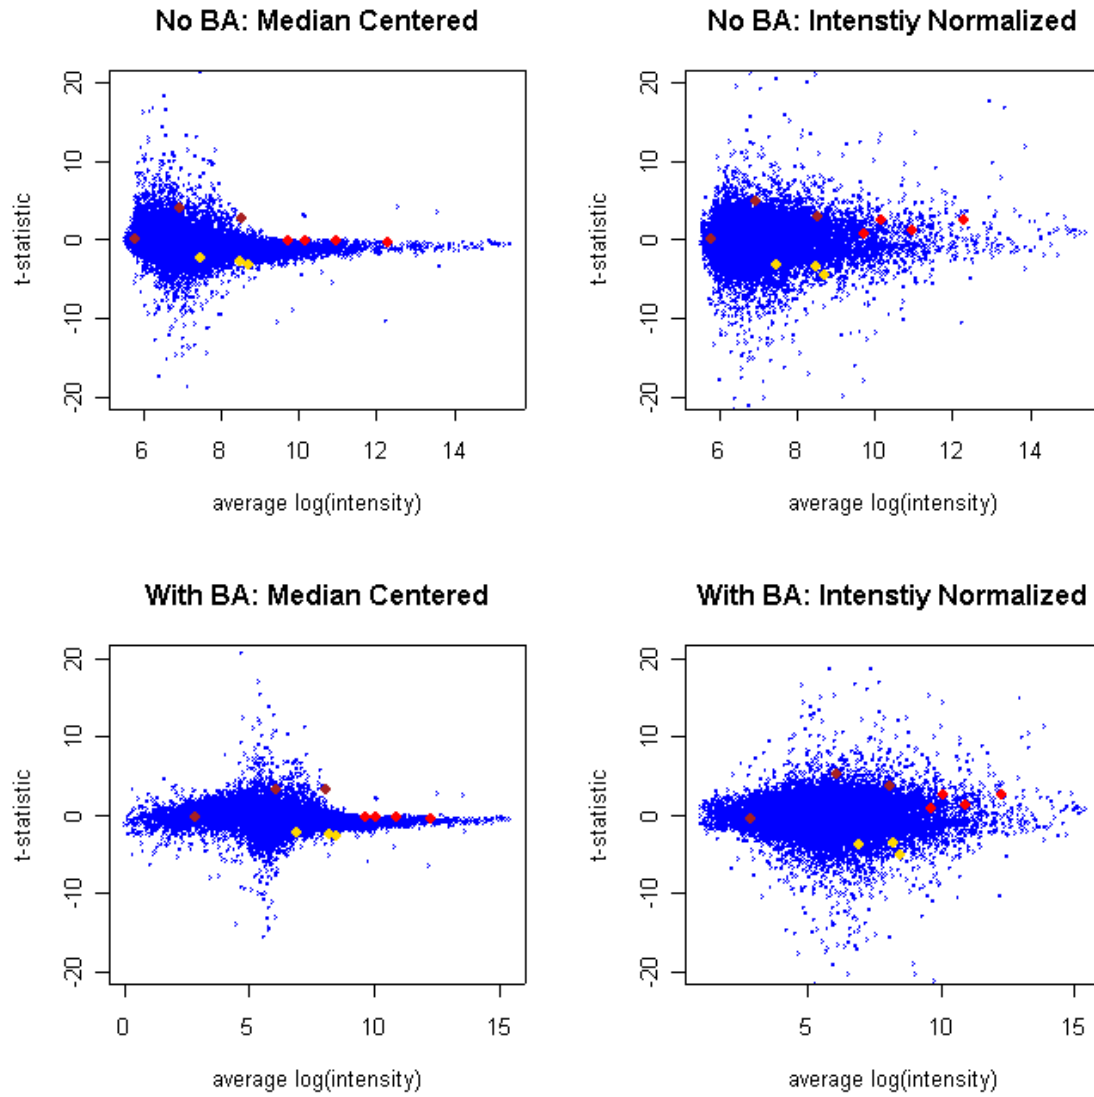

Figure 11C. Dataset C (GenePix).

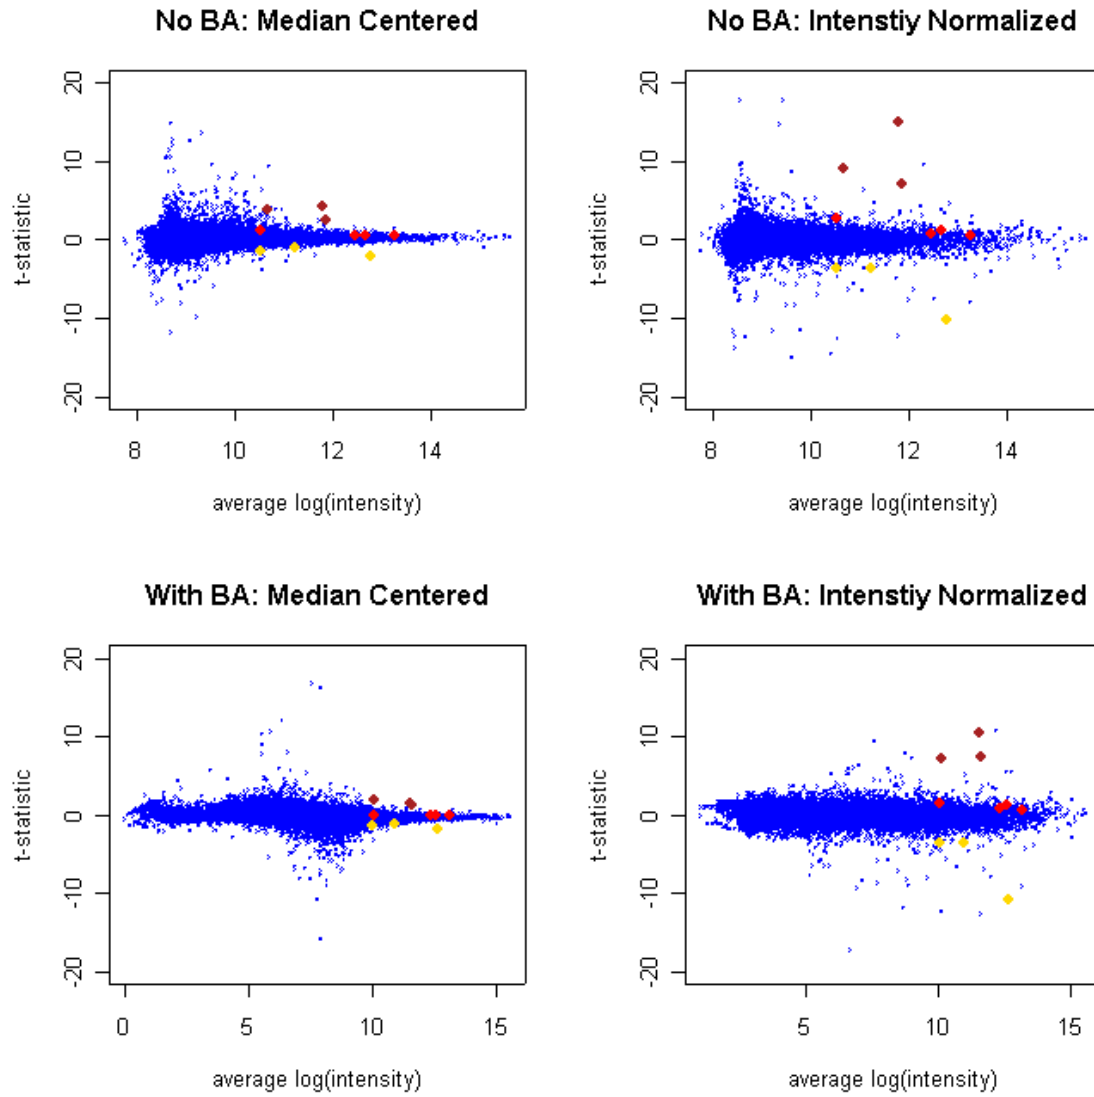

Figure 11D. Dataset D (GenePix).

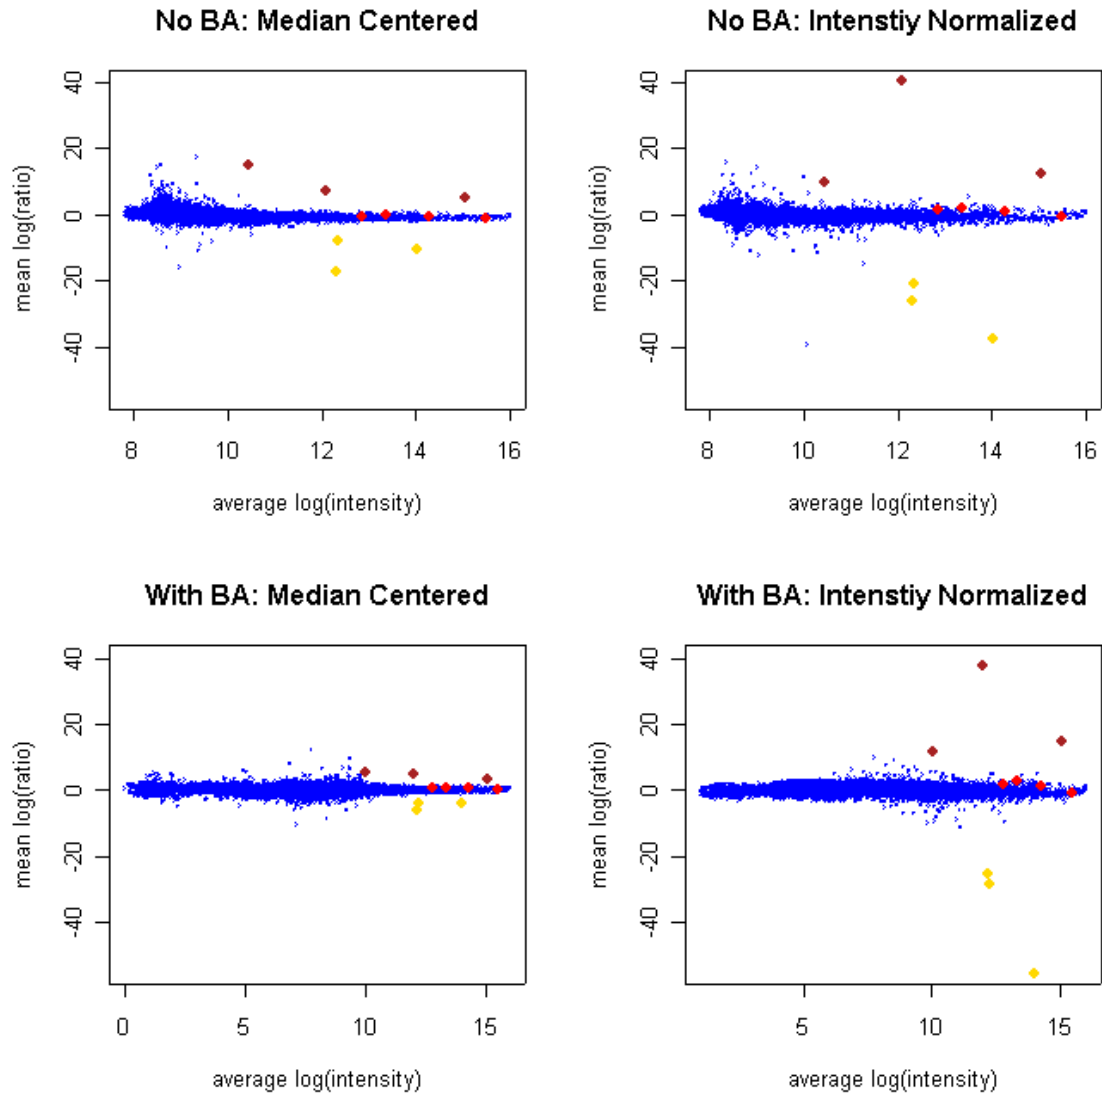

Figure 11E. Dataset E (ArraySuite).

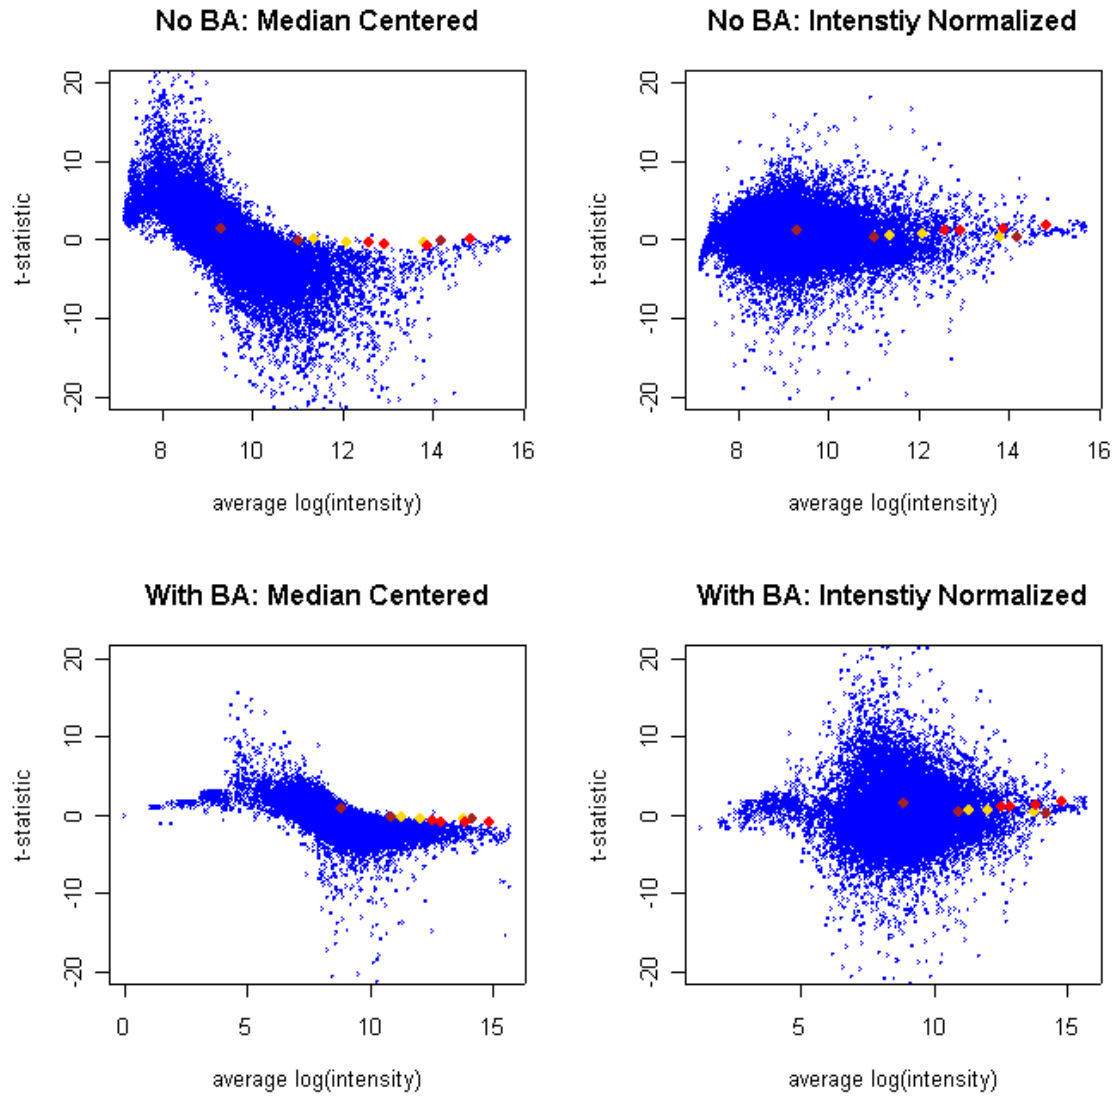

Supplement: nar_32_18_5471__1.pdf [file nar_32_18_5471__1.pdf]
